# Supplementary material for: Relationships between the home environment and physical activity and dietary patterns of preschool children: a cross-sectional study
Source: Springer Nature journal article supplement (doi:10.1186/1479-5868-5-31), 2008-01-01
Supplement: Additional file 1 [file 1479-5868-5-31-s1.doc]

Items included in the Physical and Nutritional Home Environment Inventory

| Physical home environment item | Likert scale | | | |
| --- | --- | --- | --- | --- |
|  |  |  |  |  |
| 1. How often does your child travel to childcare/preschool by walking, riding bicycle/tricycle, public transport? (bus/train/tram) | frequently | sometimes | occasionally | rarely/never |
| 1. How often does your child travel to childcare/preschool by car, riding in a pram, parent’s bike seat? | frequently | sometimes | occasionally | rarely/never |
| 1. How often does the child’s mother (mother-figure) go for a walk of more than 30 minutes? | >1x/week | 1x/fortnight  - 1x/month | couple of times/year | nil in last 12 months |
| 1. How often does the child’s mother (mother-figure) play sport/go running/go swimming/attend a gym/go cycling? | >1x/week | 1x/fortnight  - 1x/month | couple of times/year | nil in last 12 months |
| 1. How often does the child’s father (father-figure) go for a walk of more than 30 minutes? | >1x/week | 1x/fortnight  - 1x/month | couple of times/year | nil in last 12 months |
| 1. How often does the child’s father (father-figure) play sport/go running/go swimming/attend a gym/go cycling? | >1x/week | 1x/fortnight  - 1x/month | couple of times/year | nil in last 12 months |
| 1. How often does your child walk with you to do an errand (eg. to the local shops, to post a letter)? | >1x/week | 1x/fortnight  - 1x/month | couple of times/year | nil in last 12 months |
| 1. Is there a children’s playground within 10-minutes walking distance of your house? | yes | no |  |  |
| 1. On average, how many times per week is your child taken to any playground outside of the home? | ≥ 4x | 2-3x | once/week | < once/  week |
| 1. Do you own a dog? | yes | no |  |  |
| 1. How often does your child attend swimming lessons? | frequently | sometimes | occasionally | rarely/never |
| 1. How often does your child attend any type of dance, kindergym, gymnastics, or any other organised physical activity? | frequently | sometimes | occasionally | rarely/never |
| 1. How often does your family use the local book and/or toy library? | frequently | sometimes | occasionally | rarely/never |
| 1. How many televisions are in your household? | continuous variable | | | |
| 1. Are there any televisions in view of where main meals are eaten? | yes | no |  |  |
| 1. Is there a television in the parents’ bedroom? | yes | no |  |  |
| 1. Is there a television in your preschool child’s bedroom? | yes | no |  |  |
| 1. Is there a television in your other children’s bedroom/s? | yes | no |  |  |
| 1. Does your family have cable/satellite TV? | yes | no |  |  |
| 1. Does your family own a video-player (VCR)? | yes | no |  |  |
| 1. Does your family own a DVD player? | yes | no |  |  |
| 1. Does your family have a computer at home? | yes | no |  |  |
| 1. Does your household have an internet connection? | yes | no |  |  |
| 1. Does your preschool child have access to a play-station/X-box at home? | yes | no |  |  |
| 1. How often is your television left on, whether or not it is being watched? | frequently | sometimes | occasionally | rarely/never |
| 1. How often do the adults in your family watch the television news during the evening meal? | frequently | sometimes | occasionally | rarely/never |
| 1. How much do the adults in your household set rules about children’s television viewing? | very much | quite a bit | not very much | not at all |
| 1. How much do you try to limit your preschool child’s exposure to television advertising? | very much | quite a bit | not very much | not at all |
| 1. How much does your family use labour saving devices (such as dishwashing machine, remote control gate, electric roller door, leaf blower etc)? | very much | quite a bit | not very much | not at all |
| 1. What is the size of the yard area available for play by the child (m²)? | continuous variable | | | |
| 1. What is the size of the lawn area (m²)? | continuous variable | | | |
| 1. Does the yard have a paved area that your child can use for bike riding? | yes | no |  |  |
| 1. What other sporting/play equipment do you have available for your preschool child? (The complete list is available from the authors) | continuous variable | | | |

| Nutritional home environment items | Likert scale | | | |
| --- | --- | --- | --- | --- |
|  |  |  |  |  |
| 1. What is the average time that you spend preparing the evening meal? | 0-15 min | 15-30 min | 30-60 min | >60 min |
| 1. How many times a week does one or both parents eat the main meal of the day with your child/children? | 1-2x | 3-4x | 5-6x | ≥7x |
| 1. How many meals does your child eat per day? | continuous variable | | | |
| 1. How many snacks does your child eat per day? (anything eaten outside of the main meal) | continuous variable | | | |
| 1. How often does your child eat the evening meal in front of the television (turned on)? | frequently | sometimes | occasionally | rarely/never |
| 1. How often does your child eat other meals in front of the television (turned on)? | frequently | sometimes | occasionally | rarely/never |
| 1. How often does your child eat snacks in front of the television (turned on)? | frequently | sometimes | occasionally | rarely/never |
| 1. What is the average portion size served out for your child for their evening meal? | ≤ 1/4 average dinner plate | 1/3 average dinner plate | 1/2 average dinner plate | > 1/2 average dinner plate |
| 1. How often is food consumed directly out of the packet/pot/fridge by family members? | frequently | sometimes | occasionally | rarely/never |
| 1. How often does your family purchase takeaway food, which your child also eats? | frequently | sometimes | occasionally | rarely/never |
| 1. How much does your family accept wasted food? | very accepting | accepting | unhappy about waste | very unhappy |
| 1. How often during an average meal do you remind your child to ‘eat up’? | frequently | sometimes | occasionally | rarely/never |
| 1. How often would you ask your child to eat their food such that they could have a sweet or dessert to follow? | frequently | sometimes | occasionally | rarely/never |
| 1. How often would you help feed your child (eg, hold the spoon to put food into their mouth)? | frequently | sometimes | occasionally | rarely/never |
| 1. How often do you use food to reward your child for good behaviour? | frequently | sometimes | occasionally | rarely/never |
| 1. How often do you give food ‘treats’ to your child? | frequently | sometimes | occasionally | rarely/never |
| 1. How often do other carers (eg, grandparents) give food ‘treats’ to your child? | frequently | sometimes | occasionally | rarely/never |
| 1. How often is food allowed to be eaten in front of the TV in your home? | frequently | sometimes | occasionally | rarely/never |
| 1. How often is food served ‘buffet style’ (from the middle of the table) in your household? | frequently | sometimes | occasionally | rarely/never |
| 1. How often does your child accompany the adult to do grocery (food) shopping? | frequently | sometimes | occasionally | rarely/never |
| 1. How often does your child help you prepare food? | frequently | sometimes | occasionally | rarely/never |
| 1. How relaxing on average is the atmosphere during the evening meal with your children? | very relaxing | comfortable | tense | very stressful |
| 1. How much does your family grow its own fruits and vegetables? | very much | quite a bit | not very much | not at all |
| 1. How much do you use cooking equipment for food preparation (such as oven, microwave, food processor, electric mixer)? | very much | quite a bit | not very much | not at all |
| How much do you restrict your child’s access to the following food and beverage items   1. Fruit (fresh/canned, not dried) 2. Vegetables 3. Fruit juice 4. Dairy 5. High fat/sugar snack food 6. Carbonated drinks/Cordial 7. Water 8. Second Helpings | frequently  frequently  frequently  frequently  frequently  frequently  frequently  frequently | sometimes  sometimes  sometimes  sometimes  sometimes  sometimes  sometimes  sometimes | occasionally  occasionally  occasionally  occasionally  occasionally  occasionally  occasionally  occasionally | rarely/never  rarely/never  rarely/never  rarely/never  rarely/never  rarely/never  rarely/never  rarely/never |
| Which food groups are currently available in the home (in pantry/refrigerator/freezer)?   1. Fruit 2. Vegetables 3. Fruit juice 4. Dairy 5. Chips or similar, savoury snack biscuits, salted nuts 6. Lollies, sweets, chocolates 7. Muesli bars/breakfast bars 8. Cakes/biscuits 9. Carbonated drinks/cordial (diluted = x 5) | 0-2.9kg  0-2.9kg  0-1.9L  full fat  0-99g  0-119g  0  0-139g  0-1.9L | 3-5.9kg  3-5.9kg  2-2.9L  red. fat  100-299g  120-399g  0.5 box  140-499g  2-4.9L | 6-7.9kg  6-7.9kg  3-3.9L  red./low fat  300-699g  400-799g  1-2 boxes  500-999g  5-10.9L | ≥8kg  ≥8kg  ≥4L  low fat  ≥700g  ≥800g  >2 boxes  ≥1000g  ≥10L |
|  |  |  |  |  |
